# Supplementary material for: Evolutionary Dynamics of Mexican Lineage H5N2 Avian Influenza Viruses
Source: MDPI journal article supplement (doi:10.3390/v14050958), 2022-05-03
Supplement: s1 [file s1]

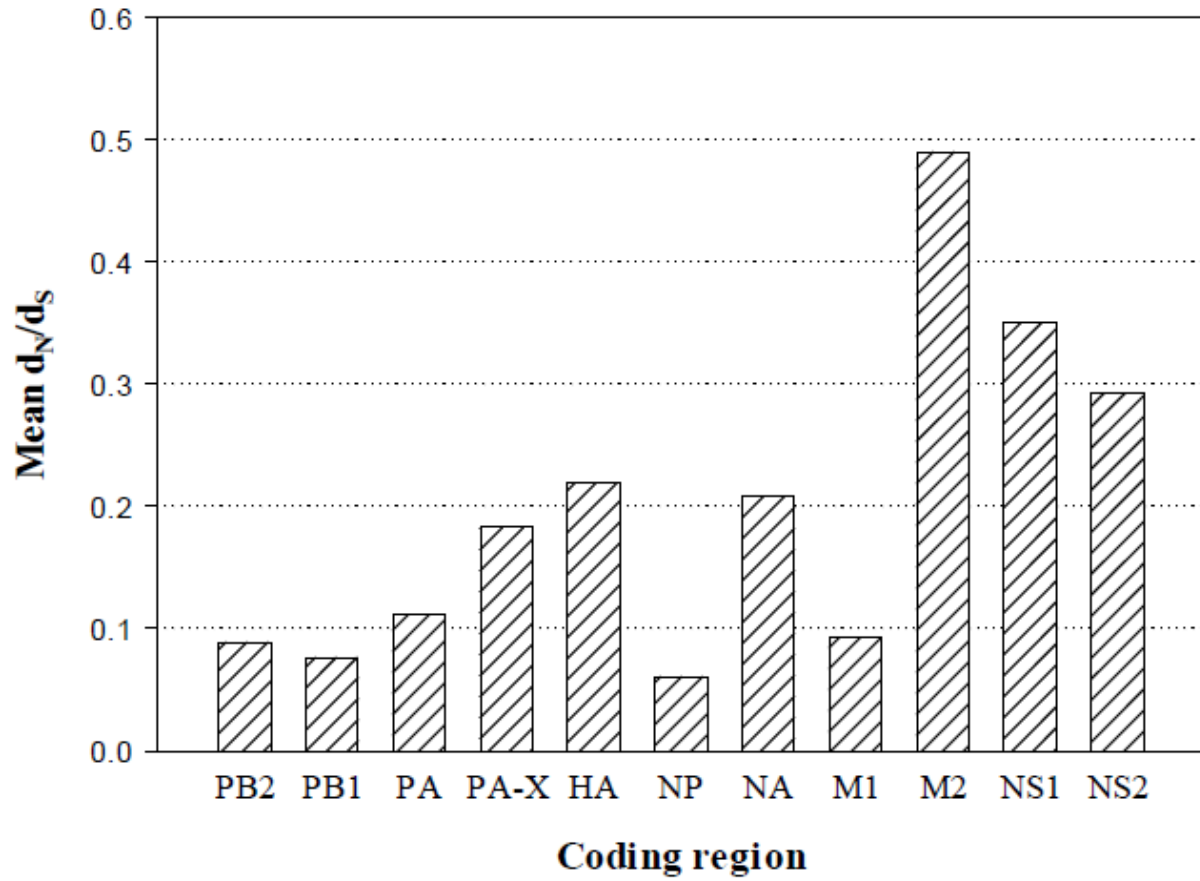

**Figure S1.** Mean dN/dS values for major coding regions of Mexican lineage H5N2 AIVs. Only full genomes of H5N2 AIVs were analyzed.
