# Supplementary material for: Evolutionary Dynamics of Mexican Lineage H5N2 Avian Influenza Viruses
Source: MDPI journal article supplement (doi:10.3390/v14050958), 2022-05-03
Supplement: s1 [file s1]

Supplementary Table S1. 2016-2019 Mexican H5N2 AIVs used in this study.

| Strain                                     | Collection date (d/m/y) | Type of surveillance | Type of sampled bird | GenBank accession no. | HA cleavage site motif |
|--------------------------------------------|-------------------------|----------------------|----------------------|-----------------------|------------------------|
| A/chicken/Hidalgo/CPA-48304-16/2016        | 05-12-2016              | Active surveillance  | Healthy              | MZ564905-MZ564912     | PQRKTR/G               |
| A/chicken/Michoacan/CPA-48911-16/2016      | 13-12-2016              | Active surveillance  | Healthy              | MZ565233-MZ565240     | PQRKTR/G               |
| A/chicken/Michoacan/CPA-48912-16/2016      | 13-12-2016              | Active surveillance  | Healthy              | MZ565241-MZ565248     | PQRKTR/G               |
| A/chicken/Jalisco/CPA-49007-16/2016        | 13-12-2016              | Active surveillance  | Healthy              | MZ565201-MZ565208     | PQRKTR/G               |
| A/chicken/Michoacan/CPA-49737-16/2016      | 19-12-2016              | Active surveillance  | Healthy              | MZ565249-MZ565256     | PQKRKR/G               |
| A/chicken/Jalisco/CPA-49745-16/2016        | 19-12-2016              | Active surveillance  | Healthy              | MZ565209-MZ565216     | PQRKTR/G               |
| A/chicken/Jalisco/CPA-49950-16/2016        | 20-12-2016              | Active surveillance  | Healthy              | MZ565217-MZ565224     | PQRKTR/G               |
| A/chicken/Jalisco/CPA-00822-17/2017        | 13-01-2017              | Active surveillance  | Healthy              | MZ564913-MZ564920     | PQRKTR/G               |
| A/chicken/Jalisco/CPA-00823-17/2017        | 13-01-2017              | Active surveillance  | Healthy              | MZ564921-MZ564928     | PQRKTR/G               |
| A/chicken/Veracruz/CPA-00735-17/2017       | 13-01-2017              | Active surveillance  | Healthy              | MZ565433-MZ565440     | PQRKTR/G               |
| A/chicken/Veracruz/CPA-00736-17/2017       | 13-01-2017              | Active surveillance  | Healthy              | MZ565441-MZ565448     | PQRKTR/G               |
| A/chicken/Guanajuato/CPA-00801-17/2017     | 16-01-2017              | Active surveillance  | Healthy              | MZ564769-MZ564776     | PQRKTR/G               |
| A/chicken/Jalisco/CPA-02169-17/2017        | 25-01-2017              | Active surveillance  | Healthy              | MZ564929-MZ564936     | PQRKTR/G               |
| A/chicken/Queretaro/CPA-02177-17/2017      | 31-01-2017              | Active surveillance  | Dead corpse          | MZ565313-MZ565320     | PQRKTR/G               |
| A/chicken/Queretaro/CPA-02178-17/2017      | 31-01-2017              | Active surveillance  | Dead corpse          | MZ565321-MZ565328     | PQKRKR/G               |
| A/chicken/Queretaro/CPA-02179-17/2017      | 31-01-2017              | Active surveillance  | Dead corpse          | MZ565329-MZ565336     | PQRKTR/G               |
| A/chicken/Morelos/CPA-02447-17/2017        | 31-01-2017              | Active surveillance  | Sentinel             | MZ565257-MZ565264     | PQRKTR/G               |
| A/chicken/Jalisco/CPA-03072-17/2017        | 02-02-2017              | Passive surveillance | Sick                 | MZ564937-MZ564944     | PQRKTR/G               |
| A/chicken/Jalisco/CPA-03198-17/2017        | 03-02-2017              | Active surveillance  | Healthy              | MZ564945-MZ564952     | PQRKTR/G               |
| A/chicken/Jalisco/CPA-03518-17/2017        | 08-02-2017              | Active surveillance  | Healthy              | MZ564961-MZ564968     | PQRKTR/G               |
| A/chicken/Hidalgo/CPA-03739-17/2017        | 13-02-2017              | Active surveillance  | Healthy              | MZ564889-MZ564896     | PQRKTR/G               |
| A/chicken/Veracruz/CPA-04704-17/2017       | 22-02-2017              | Active surveillance  | Vaccinated           | MZ565449-MZ565456     | PQRKTR/G               |
| A/chicken/Morelos/CPA-05154-17/2017        | 23-02-2017              | Active surveillance  | Sentinel             | MZ565265-MZ565272     | PQRKTR/G               |
| A/chicken/Colima/CPA-04929-17/2017         | 24-02-2017              | Active surveillance  | Healthy              | MZ564745-MZ564752     | PQRKTR/G               |
| A/chicken/Queretaro/CPA-05386-17/2017      | 24-02-2017              | Active surveillance  | Healthy              | MZ565377-MZ565384     | PQRKTR/G               |
| A/chicken/Jalisco/CPA-06116-17/2017        | 01-03-2017              | Active surveillance  | Healthy              | MZ565033-MZ565040     | PQKRKR/G               |
| A/chicken/Veracruz/CPA-05599-17/2017       | 02-03-2017              | Active surveillance  | Vaccinated           | MZ565457-MZ565464     | PQRKTR/G               |
| A/chicken/Veracruz/CPA-05600-17/2017       | 02-03-2017              | Active surveillance  | Vaccinated           | MZ565465-MZ565472     | PQKRKR/G               |
| A/chicken/Queretaro/CPA-06507-17/2017      | 06-03-2017              | Active surveillance  | Healthy              | MZ565385-MZ565392     | PQRKTR/G               |
| A/chicken/Guanajuato/CPA-11248-17/2017     | 07-04-2017              | Active surveillance  | Sentinel             | MZ564841-MZ564848     | PQRKTR/G               |
| A/chicken/Guanajuato/CPA-12461-17/2017     | 18-04-2017              | Active surveillance  | Healthy              | MZ564849-MZ564856     | PQRKTR/G               |
| A/chicken/Jalisco/CPA-12377-17/2017        | 19-04-2017              | Active surveillance  | Healthy              | MZ565177-MZ565184     | PQRKTR/G               |
| A/chicken/Puebla/CPA-14731-17/2017         | 04-05-2017              | Active surveillance  | Vaccinated           | MZ565305-MZ565312     | PQRKTR/G               |
| A/chicken/Guanajuato/CPA-15050-17/2017     | 05-05-2017              | Active surveillance  | Dead corpse          | MZ564857-MZ564864     | PQRKTR/G               |
| A/chicken/Yucatan/CPA-15038-17/2017        | 06-05-2017              | Passive surveillance | Sick                 | MZ565489-MZ565496     | LQRKTR/G               |
| A/chicken/Guanajuato/CPA-17726-17/2017     | 25-05-2017              | Active surveillance  | Sentinel             | MZ564865-MZ564872     | PQRKTR/G               |
| A/chicken/Coahuila/CPA-17850-17/2017       | 01-06-2017              | Active surveillance  | Vaccinated           | MZ564737-MZ564744     | PQRKTR/G               |
| A/chicken/Morelos/CPA-18659-17/2017        | 06-06-2017              | Active surveillance  | Sentinel             | MZ565273-MZ565280     | PQRKTR/G               |
| A/chicken/Mexico/CPA-19234-17/2017         | 13-06-2017              | Active surveillance  | Dead corpse          | MZ565225-MZ565232     | PQKRKR/G               |
| A/chicken/Aguascalientes/CPA-20747-17/2017 | 22-06-2017              | Active surveillance  | Sentinel             | MZ564721-MZ564728     | PQRKTR/G               |
| A/chicken/Veracruz/CPA-21377-17/2017       | 23-06-2017              | Active surveillance  | Vaccinated           | MZ565481-MZ565488     | PQRKTR/G               |
| A/chicken/Jalisco/CPA-22166-17/2017        | 29-06-2017              | Active surveillance  | Healthy              | MZ565193-MZ565200     | PQKRKR/G               |

|                                             |            |                      |            |                   |          |
|---------------------------------------------|------------|----------------------|------------|-------------------|----------|
| A/chicken/Hidalgo/CPA-41295-17/2017         | 17-11-2017 | Active surveillance  | Healthy    | MZ564897-MZ564904 | PQRKTR/G |
| A/chicken/Guanajuato/CPA-44870-17/2017      | 19-12-2017 | Active surveillance  | Sentinel   | MZ564873-MZ564880 | PQRKTR/G |
| A/chicken/Guanajuato/CPA-00114-18/2018      | 03-01-2018 | Active surveillance  | Sentinel   | MZ564761-MZ564768 | PQRKTR/G |
| A/chicken/Puebla/CPA-01572-18/2018          | 28-01-2018 | Active surveillance  | Vaccinated | MZ565281-MZ565288 | PQRKTR/G |
| A/chicken/Durango/CPA-08970-18/2018         | 08-05-2018 | Active surveillance  | Sentinel   | MZ564753-MZ564760 | PQRKTR/G |
| A/chicken/Queretaro/CPA-11747-18/2018       | 06-06-2018 | Active surveillance  | Healthy    | MZ565409-MZ565416 | PQRKTR/G |
| A/chicken/Veracruz/CPA-13920-18/2018        | 28-06-2018 | Active surveillance  | Healthy    | MZ565473-MZ565480 | PQRKTR/G |
| A/chicken/Jalisco/CPA-16963-18/2018         | 31-07-2018 | Active surveillance  | Healthy    | MZ565185-MZ565192 | PQRKTR/G |
| A/chicken/Aguascalientes/CPA-03203-19/2019  | 25-02-2019 | Active surveillance  | Sentinel   | MZ564657-MZ564664 | PQKRKR/G |
| A/chicken/Aguascalientes/CPA-03202-19/2019  | 25-02-2019 | Active surveillance  | Sentinel   | MZ564649-MZ564656 | PQKRKR/G |
| A/chicken/Hidalgo/CPA-03355-19/2019         | 27-02-2019 | Active surveillance  | Healthy    | MZ564881-MZ564888 | PQRKTR/G |
| A/chicken/Aguascalientes/CPA-03336-19/2019  | 27-02-2019 | Active surveillance  | Sentinel   | MZ564665-MZ564672 | PQRKTR/G |
| A/chicken/Jalisco/CPA-03447-19/2019         | 28-02-2019 | Active surveillance  | Healthy    | MZ564953-MZ564960 | PQRKTR/G |
| A/chicken/Jalisco/CPA-03607-19/2019         | 05-03-2019 | Active surveillance  | Healthy    | MZ564977-MZ564984 | PQRKTR/G |
| A/chicken/Jalisco/CPA-03604-19/2019         | 05-03-2019 | Active surveillance  | Healthy    | MZ564969-MZ564976 | PQRKTR/G |
| A/chicken/Queretaro/CPA-03806-19/2019       | 07-03-2019 | Active surveillance  | Healthy    | MZ565345-MZ565352 | PQRKTR/G |
| A/chicken/Queretaro/CPA-03807-19/2019       | 07-03-2019 | Active surveillance  | Sentinel   | MZ565353-MZ565360 | PQRKTR/G |
| A/chicken/Queretaro/CPA-03805-19/2019       | 07-03-2019 | Active surveillance  | Sentinel   | MZ565337-MZ565344 | PQRKTR/G |
| A/chicken/Guanajuato/CPA-03879-19/2019      | 08-03-2019 | Active surveillance  | Sentinel   | MZ564777-MZ564784 | PQRKTR/G |
| A/chicken/Puebla/CPA-03924-19/2019          | 11-03-2019 | Active surveillance  | Healthy    | MZ565289-MZ565296 | PQRKTR/G |
| A/chicken/Queretaro/CPA-04112-19/2019       | 12-03-2019 | Active surveillance  | Healthy    | MZ565361-MZ565368 | PQRKTR/G |
| A/chicken/Jalisco/CPA-04141-19/2019         | 13-03-2019 | Active surveillance  | Healthy    | MZ564985-MZ564992 | PQRKTR/G |
| A/chicken/Jalisco/CPA-04262-19/2019         | 14-03-2019 | Active surveillance  | Healthy    | MZ564993-MZ565000 | PQRKTR/G |
| A/chicken/Guanajuato/CPA-04382-19/2019      | 15-03-2019 | Active surveillance  | Sentinel   | MZ564785-MZ564792 | PQRKTR/G |
| A/chicken/Aguascalientes/CPA-04479-19/2019  | 19-03-2019 | Active surveillance  | Sentinel   | MZ564673-MZ564680 | PQKRKR/G |
| A/chicken/Jalisco/CPA-04649-19/2019         | 20-03-2019 | Active surveillance  | Healthy    | MZ565001-MZ565008 | PQRKTR/G |
| A/chicken/Queretaro/CPA-04673-19/2019       | 20-03-2019 | Passive surveillance | Sick       | MZ565369-MZ565376 | PQRKTR/G |
| A/chicken/Jalisco/CPA-04758-19/2019         | 21-03-2019 | Active surveillance  | Healthy    | MZ565009-MZ565016 | PQRKTR/G |
| A/chicken/Jalisco/CPA-05091-19/2019         | 26-03-2019 | Active surveillance  | Healthy    | MZ565017-MZ565024 | PQRKTR/G |
| A/chicken/Guanajuato/CPA-05981-19/2019      | 08-04-2019 | Active surveillance  | Sentinel   | MZ564793-MZ564800 | PQRKTR/G |
| A/chicken/San Luis Potosi/CPA-05885-19/2019 | 08-04-2019 | Active surveillance  | Sentinel   | MZ565417-MZ565424 | PQRKTR/G |
| A/chicken/San Luis Potosi/CPA-05890-19/2019 | 08-04-2019 | Active surveillance  | Sentinel   | MZ565425-MZ565432 | PQRKTR/G |
| A/chicken/Jalisco/CPA-06016-19/2019         | 09-04-2019 | Active surveillance  | Healthy    | MZ565025-MZ565032 | PQRKTR/G |
| A/chicken/Jalisco/CPA-06432-19/2019         | 15-04-2019 | Active surveillance  | Healthy    | MZ565041-MZ565048 | PQRKTR/G |
| A/chicken/Jalisco/CPA-06506-19/2019         | 15-04-2019 | Active surveillance  | Healthy    | MZ565057-MZ565064 | PQRKTR/G |
| A/chicken/Jalisco/CPA-06504-19/2019         | 15-04-2019 | Active surveillance  | Healthy    | MZ565049-MZ565056 | PQRKTR/G |
| A/chicken/Jalisco/CPA-06811-19/2019         | 23-04-2019 | Active surveillance  | Healthy    | MZ565073-MZ565080 | PQRKTR/G |
| A/chicken/Jalisco/CPA-06799-19/2019         | 23-04-2019 | Active surveillance  | Healthy    | MZ565065-MZ565072 | PQKRKR/G |
| A/chicken/Puebla/CPA-06927-19/2019          | 24-04-2019 | Active surveillance  | Vaccinated | MZ565297-MZ565304 | PQRKTR/G |
| A/chicken/Aguascalientes/CPA-07048-19/2019  | 25-04-2019 | Active surveillance  | Sentinel   | MZ564681-MZ564688 | PQKRKR/G |
| A/chicken/Jalisco/CPA-07140-19/2019         | 26-04-2019 | Active surveillance  | Healthy    | MZ565089-MZ565096 | PQRKTR/G |
| A/chicken/Jalisco/CPA-07139-19/2019         | 26-04-2019 | Active surveillance  | Healthy    | MZ565081-MZ565088 | PQRETR/G |
| A/chicken/Guanajuato/CPA-07267-19/2019      | 29-04-2019 | Active surveillance  | Sentinel   | MZ564801-MZ564808 | PQRKTR/G |
| A/chicken/Jalisco/CPA-07195-19/2019         | 29-04-2019 | Active surveillance  | Healthy    | MZ565097-MZ565104 | PQKRKR/G |

|                                            |            |                     |             |                   |          |
|--------------------------------------------|------------|---------------------|-------------|-------------------|----------|
| A/chicken/Guanajuato/CPA-07268-19/2019     | 29-04-2019 | Active surveillance | Sentinel    | MZ564809-MZ564816 | PQRKTR/G |
| A/chicken/Aguascalientes/CPA-07181-19/2019 | 29-04-2019 | Active surveillance | Sentinel    | MZ564689-MZ564696 | PQRKTR/G |
| A/chicken/Jalisco/CPA-07541-19/2019        | 02-05-2019 | Active surveillance | Healthy     | MZ565105-MZ565112 | PQRKTR/G |
| A/chicken/Jalisco/CPA-07737-19/2019        | 07-05-2019 | Active surveillance | Healthy     | MZ565129-MZ565136 | PQRKTR/G |
| A/chicken/Jalisco/CPA-07715-19/2019        | 07-05-2019 | Active surveillance | Healthy     | MZ565113-MZ565120 | PQKRKR/G |
| A/chicken/Jalisco/CPA-07736-19/2019        | 07-05-2019 | Active surveillance | Healthy     | MZ565121-MZ565128 | PQRKTR/G |
| A/chicken/Aguascalientes/CPA-08115-19/2019 | 13-05-2019 | Active surveillance | Dead corpse | MZ564697-MZ564704 | PQRKTR/G |
| A/chicken/Jalisco/CPA-08103-19/2019        | 13-05-2019 | Active surveillance | Healthy     | MZ565137-MZ565144 | PQRKTR/G |
| A/chicken/Jalisco/CPA-08244-19/2019        | 14-05-2019 | Active surveillance | Healthy     | MZ565145-MZ565152 | SQKRKR/G |
| A/chicken/Aguascalientes/CPA-08331-19/2019 | 15-05-2019 | Active surveillance | Dead corpse | MZ564729-MZ564736 | PQKGKR/G |
| A/chicken/Guanajuato/CPA-08523-19/2019     | 20-05-2019 | Active surveillance | Sentinel    | MZ564817-MZ564824 | PQKRKR/G |
| A/chicken/Aguascalientes/CPA-08545-19/2019 | 20-05-2019 | Active surveillance | Dead corpse | MZ564705-MZ564712 | PQRKTR/G |
| A/chicken/Aguascalientes/CPA-08553-19/2019 | 20-05-2019 | Active surveillance | Sentinel    | MZ564713-MZ564720 | PQKRKR/G |
| A/chicken/Jalisco/CPA-08826-19/2019        | 23-05-2019 | Active surveillance | Healthy     | MZ565153-MZ565160 | PQRKTR/G |
| A/chicken/Jalisco/CPA-08831-19/2019        | 23-05-2019 | Active surveillance | Healthy     | MZ565161-MZ565168 | PQKRKR/G |
| A/chicken/Guanajuato/CPA-08992-19/2019     | 27-05-2019 | Active surveillance | Sentinel    | MZ564833-MZ564840 | PQRKTR/G |
| A/chicken/Guanajuato/CPA-08990-19/2019     | 27-05-2019 | Active surveillance | Sentinel    | MZ564825-MZ564832 | PQRKTR/G |
| A/chicken/Jalisco/CPA-09057-19/2019        | 28-05-2019 | Active surveillance | Healthy     | MZ565169-MZ565176 | PQRKTR/G |
| A/chicken/Queretaro/CPA-09515-19/2019      | 03-06-2019 | Active surveillance | Dead corpse | MZ565393-MZ565400 | PQRKTR/G |
| A/chicken/Queretaro/CPA-09543-19/2019      | 03-06-2019 | Active surveillance | Vaccinated  | MZ565401-MZ565408 | PQRKTR/G |
