# Supplementary material for: Evolutionary Dynamics of Mexican Lineage H5N2 Avian Influenza Viruses
Source: MDPI journal article supplement (doi:10.3390/v14050958), 2022-05-03

**Figure S2.** Phylogenetic incongruence analysis. ML trees for each genomic segment were inferred from 189 full-genome H5N2 viruses using RAxML. The phylogenies of segments are colored according to the origin of their HA. The phylogenetic position of each sequence was traced across all seven trees.

H5

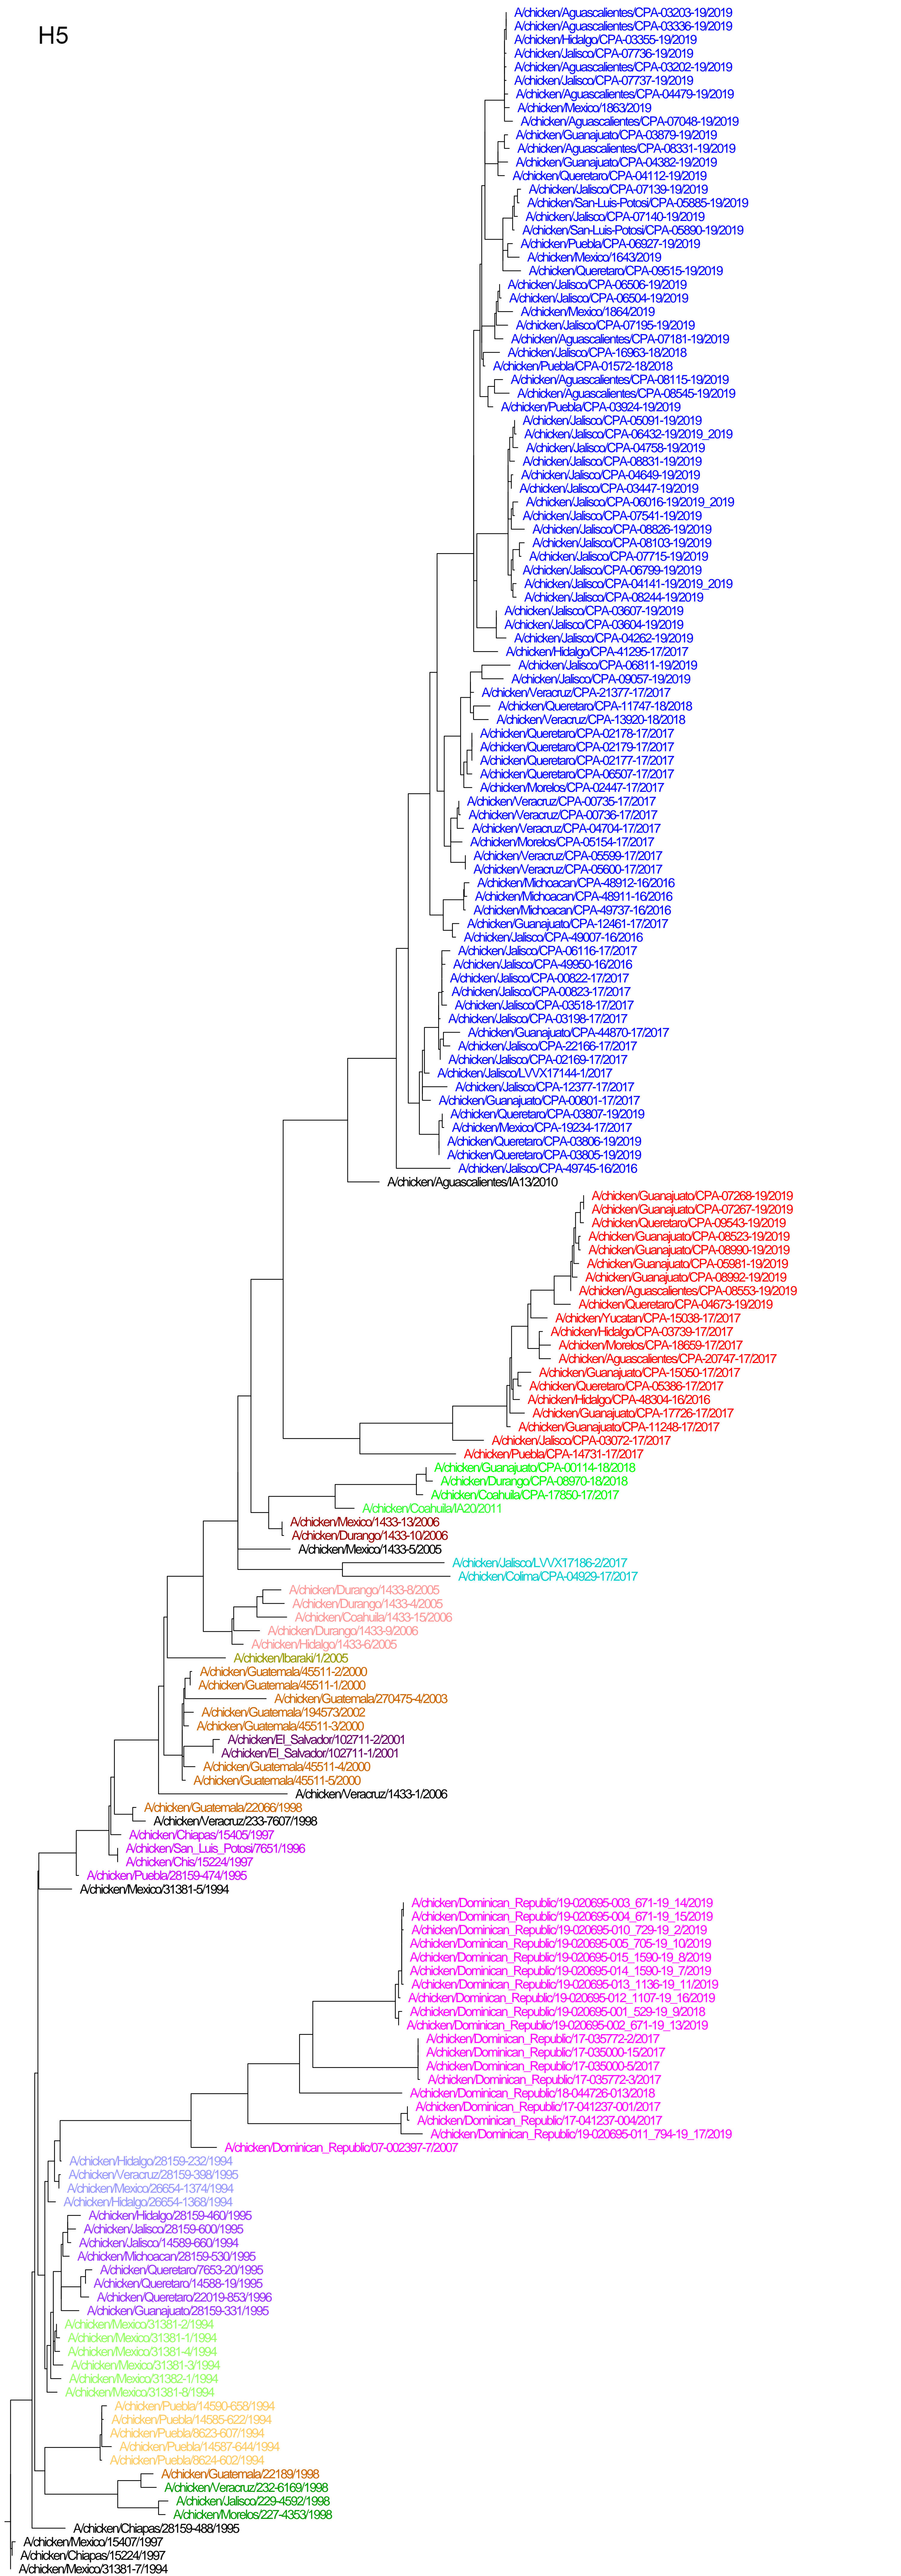

0.004



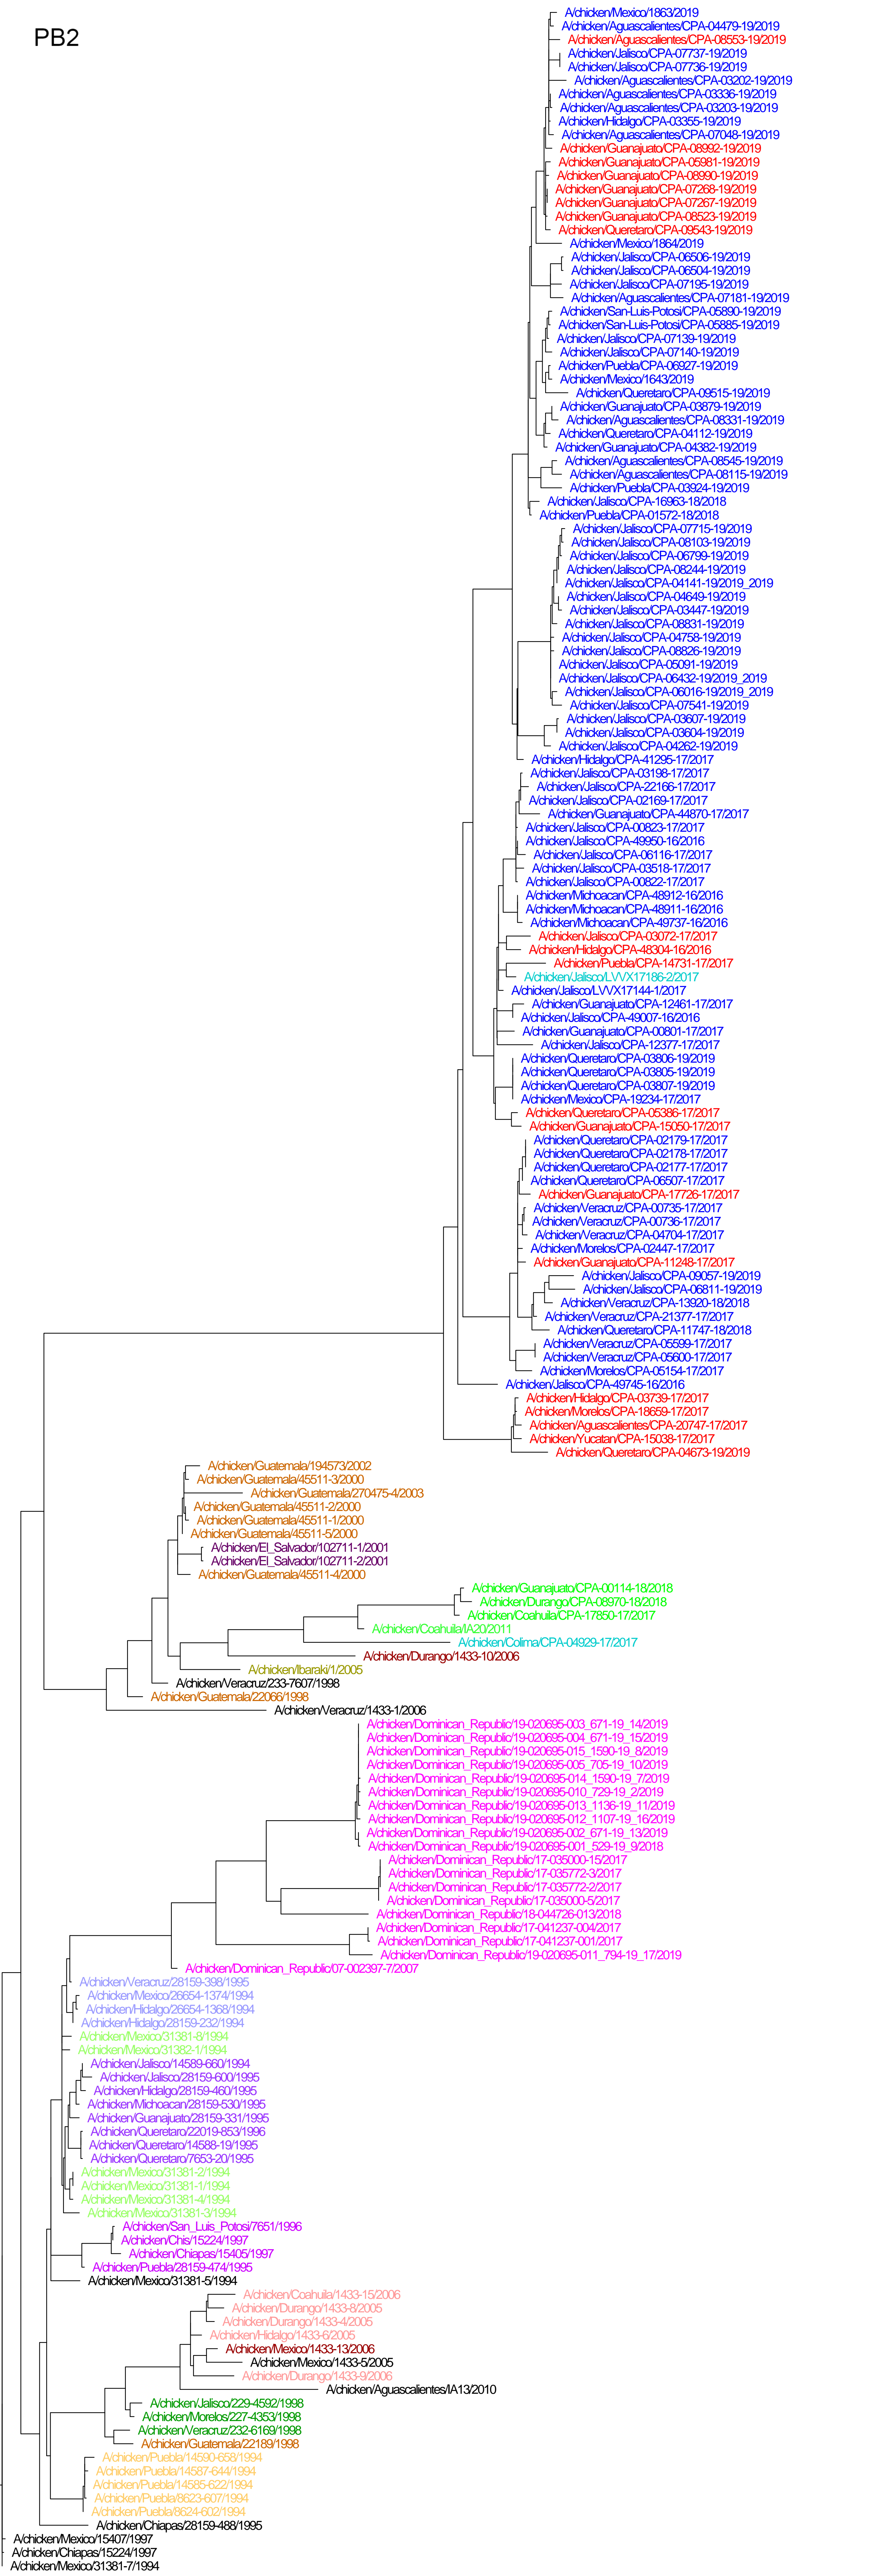



PB1

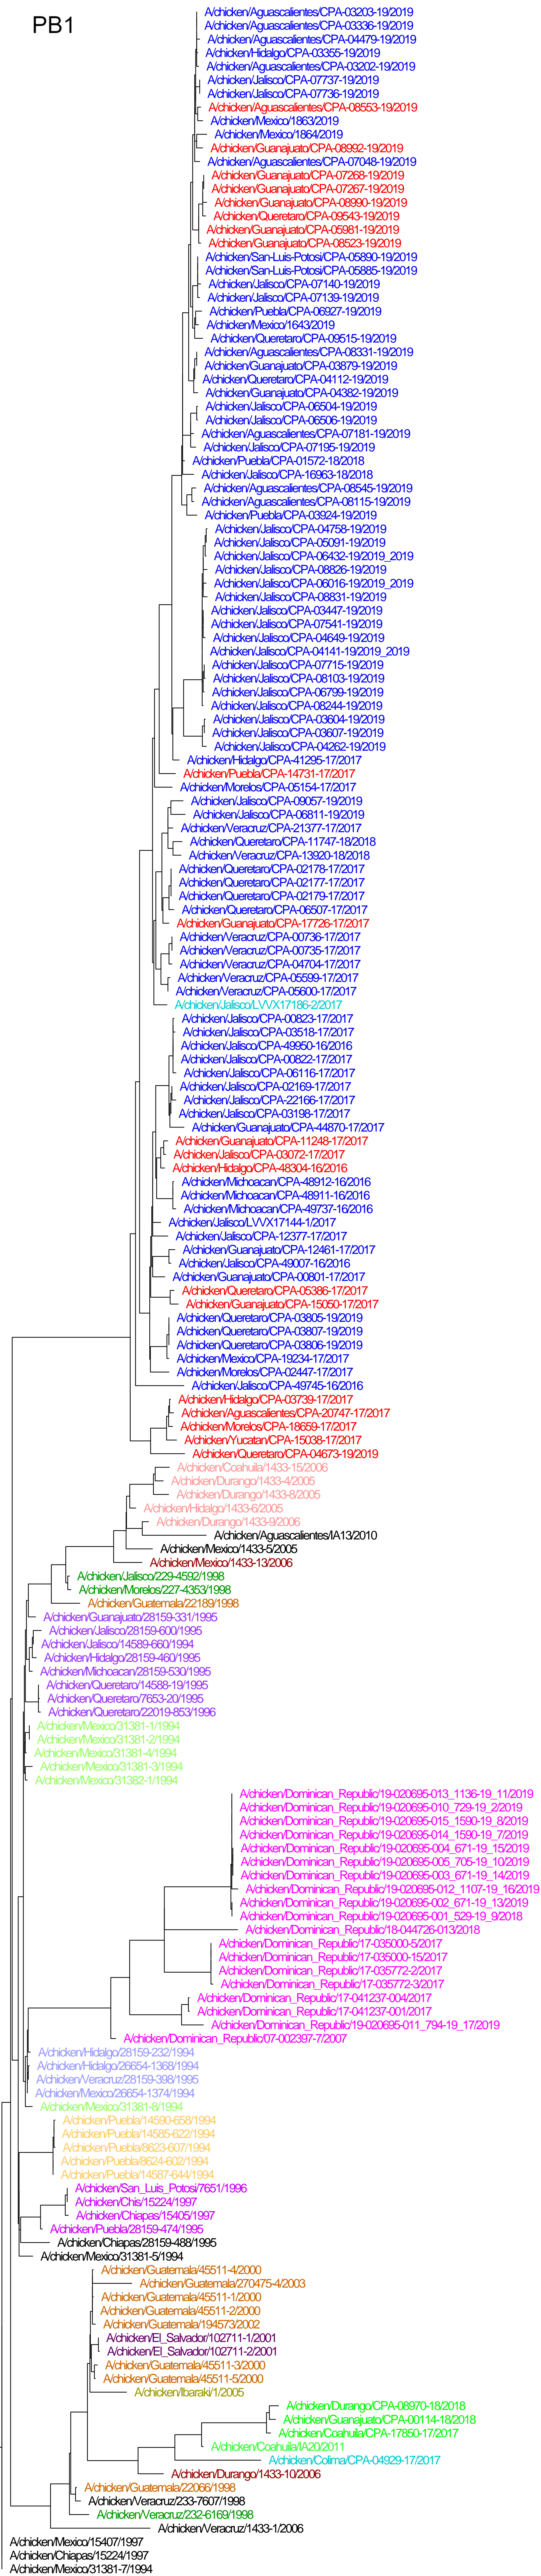



PA

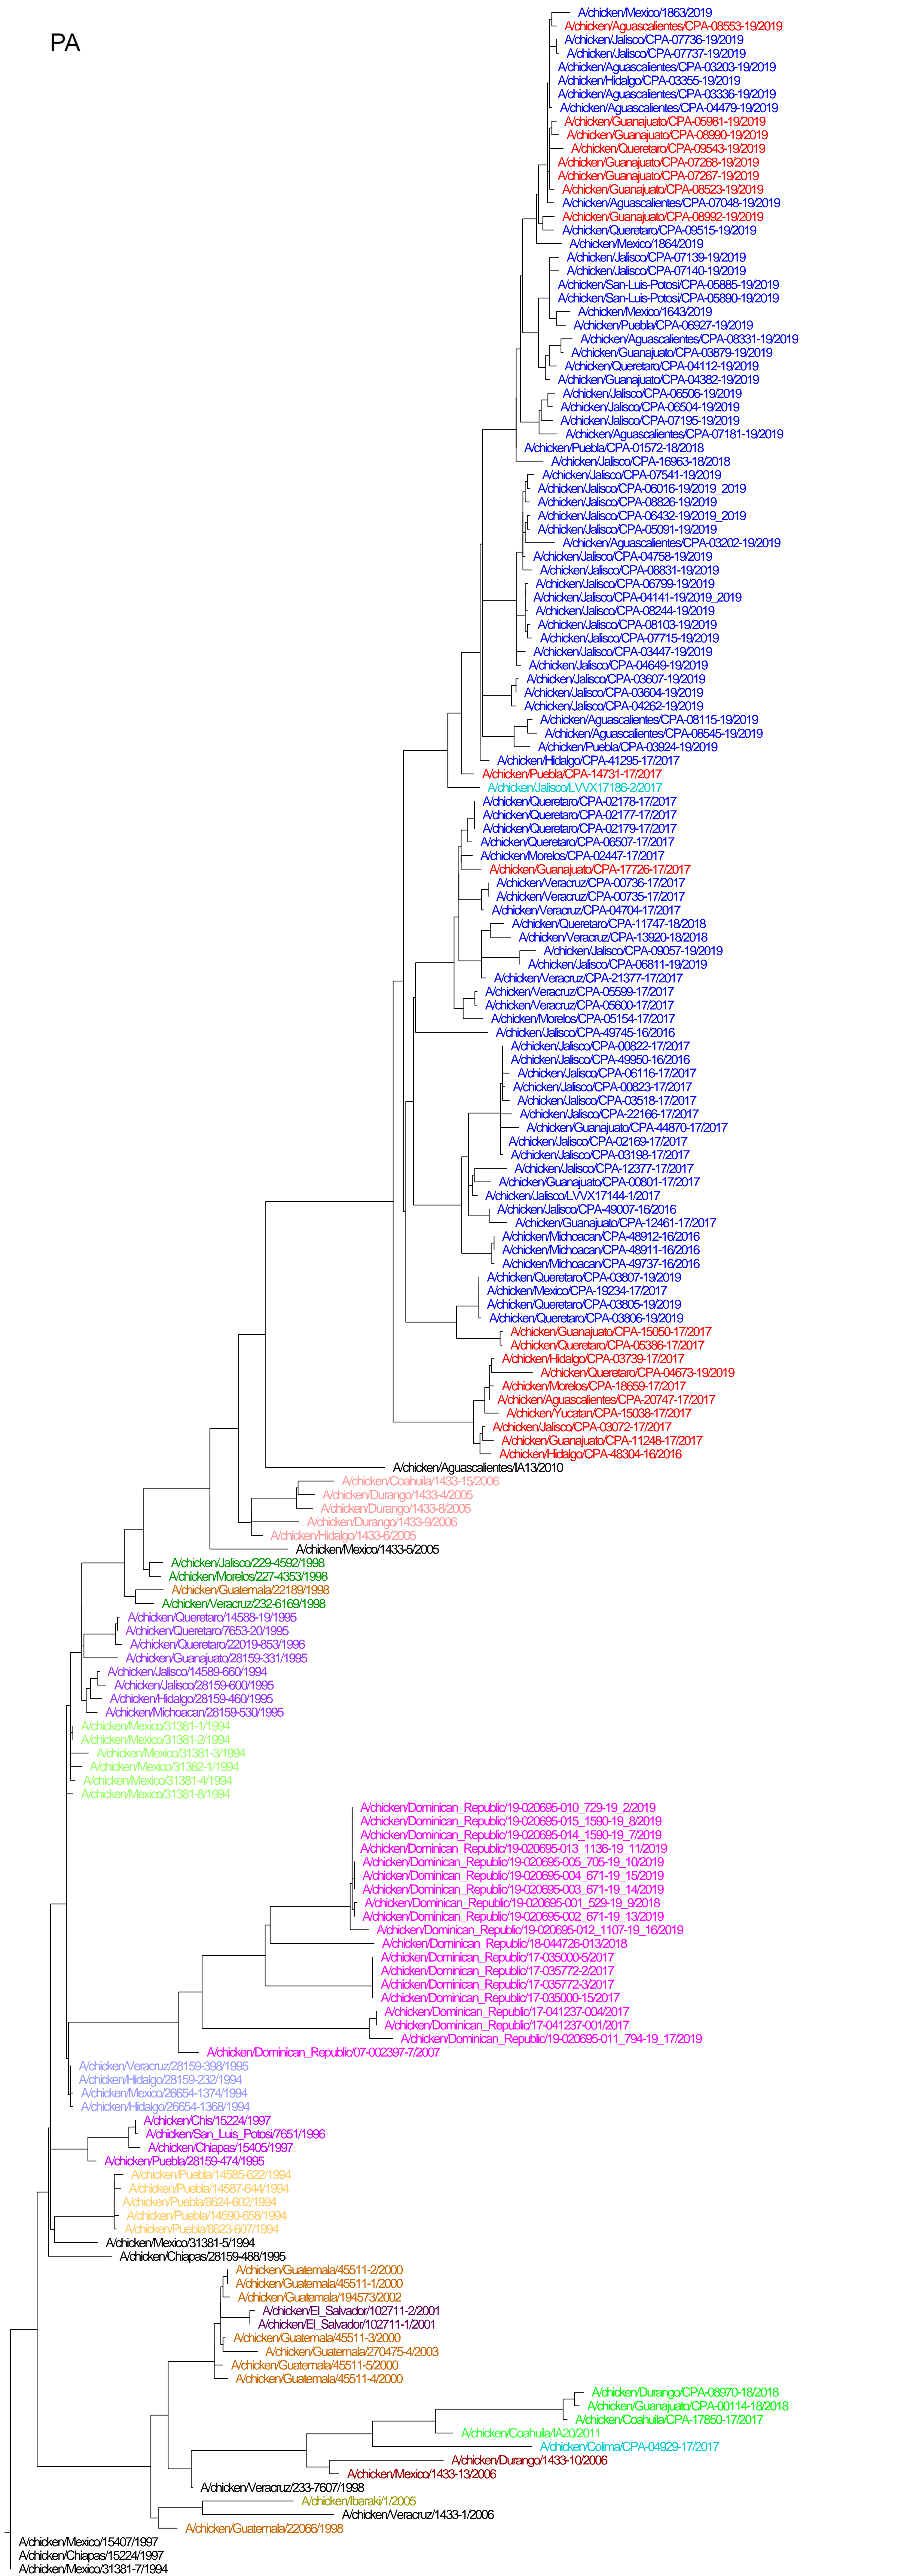

0.004



NP

Insert text here

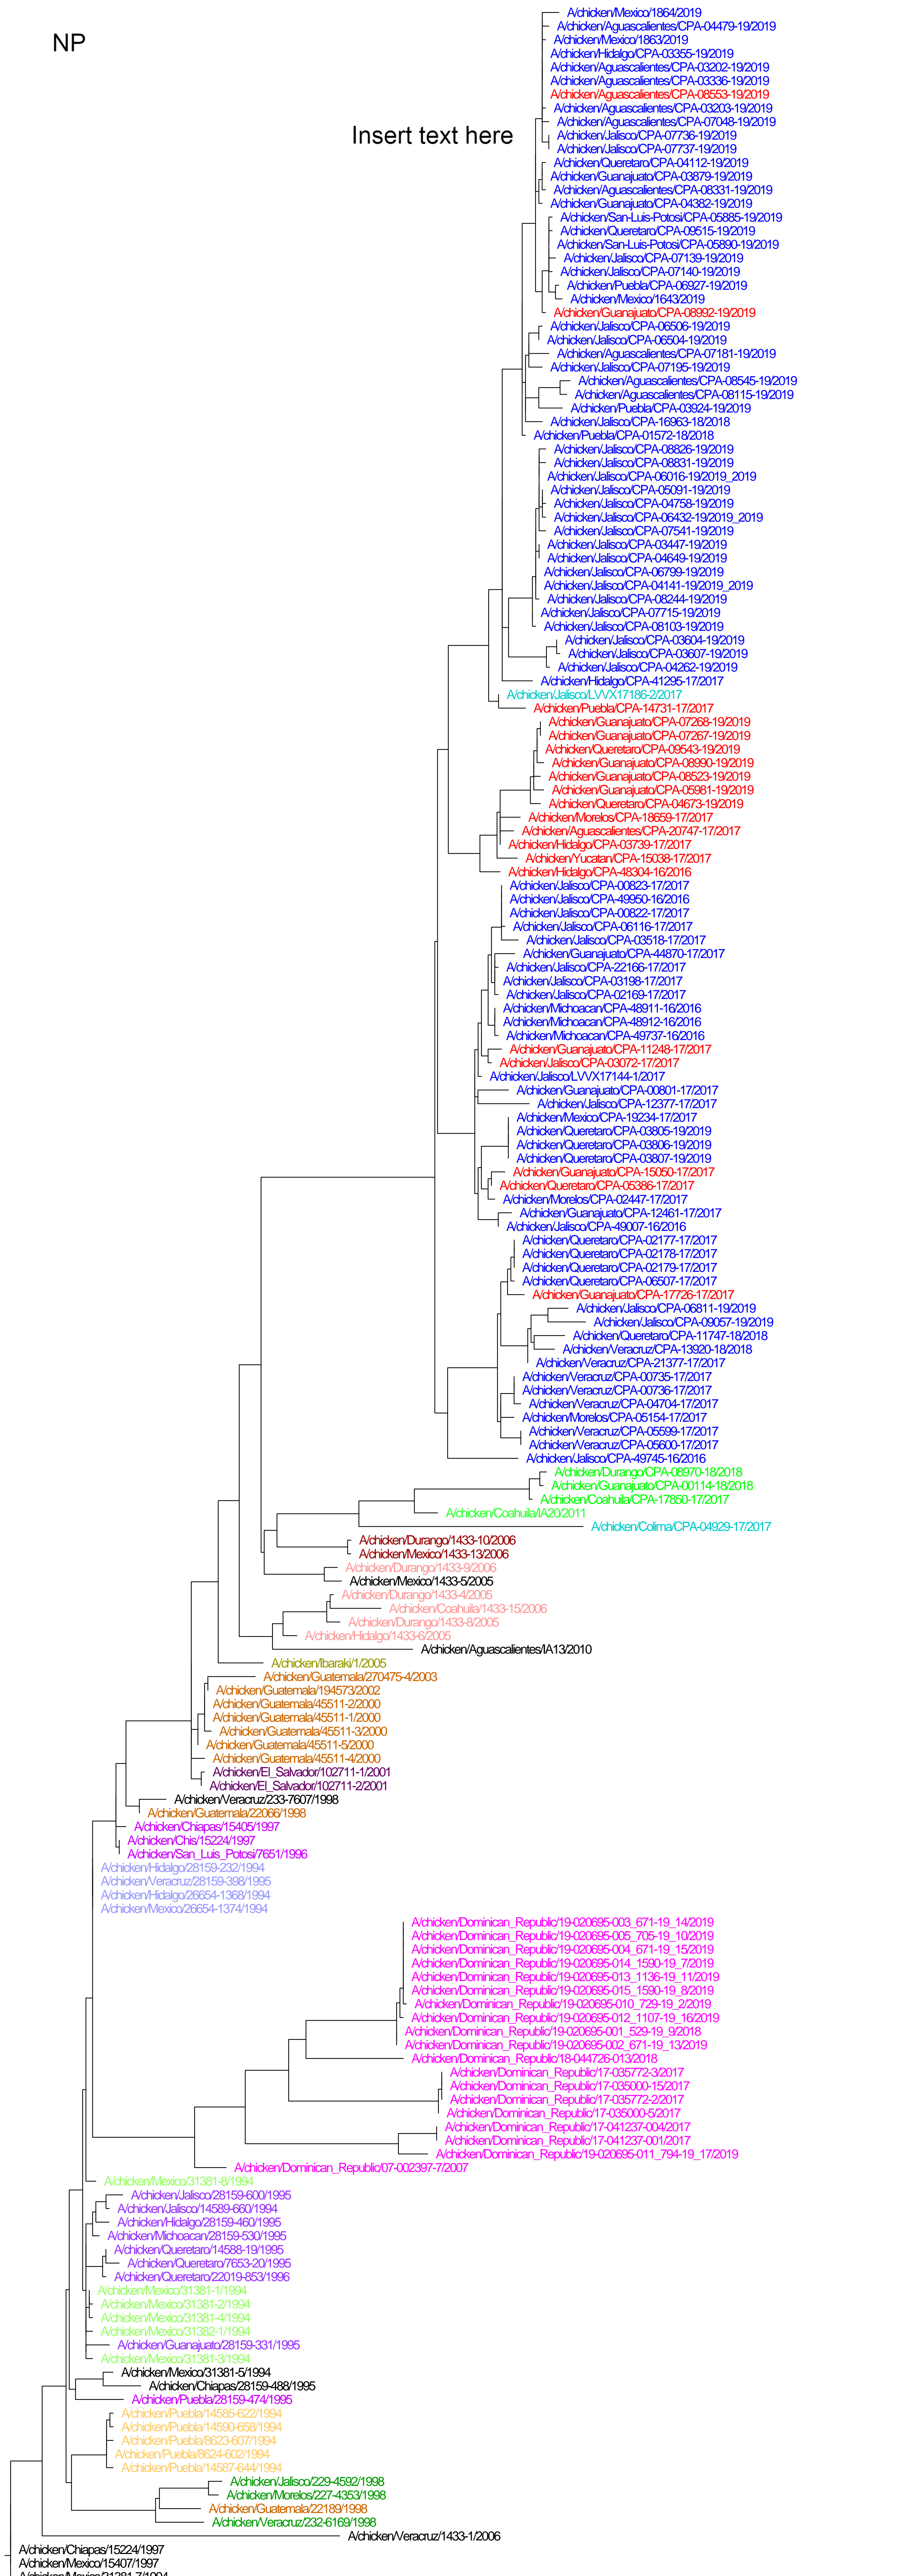

0.004



NA

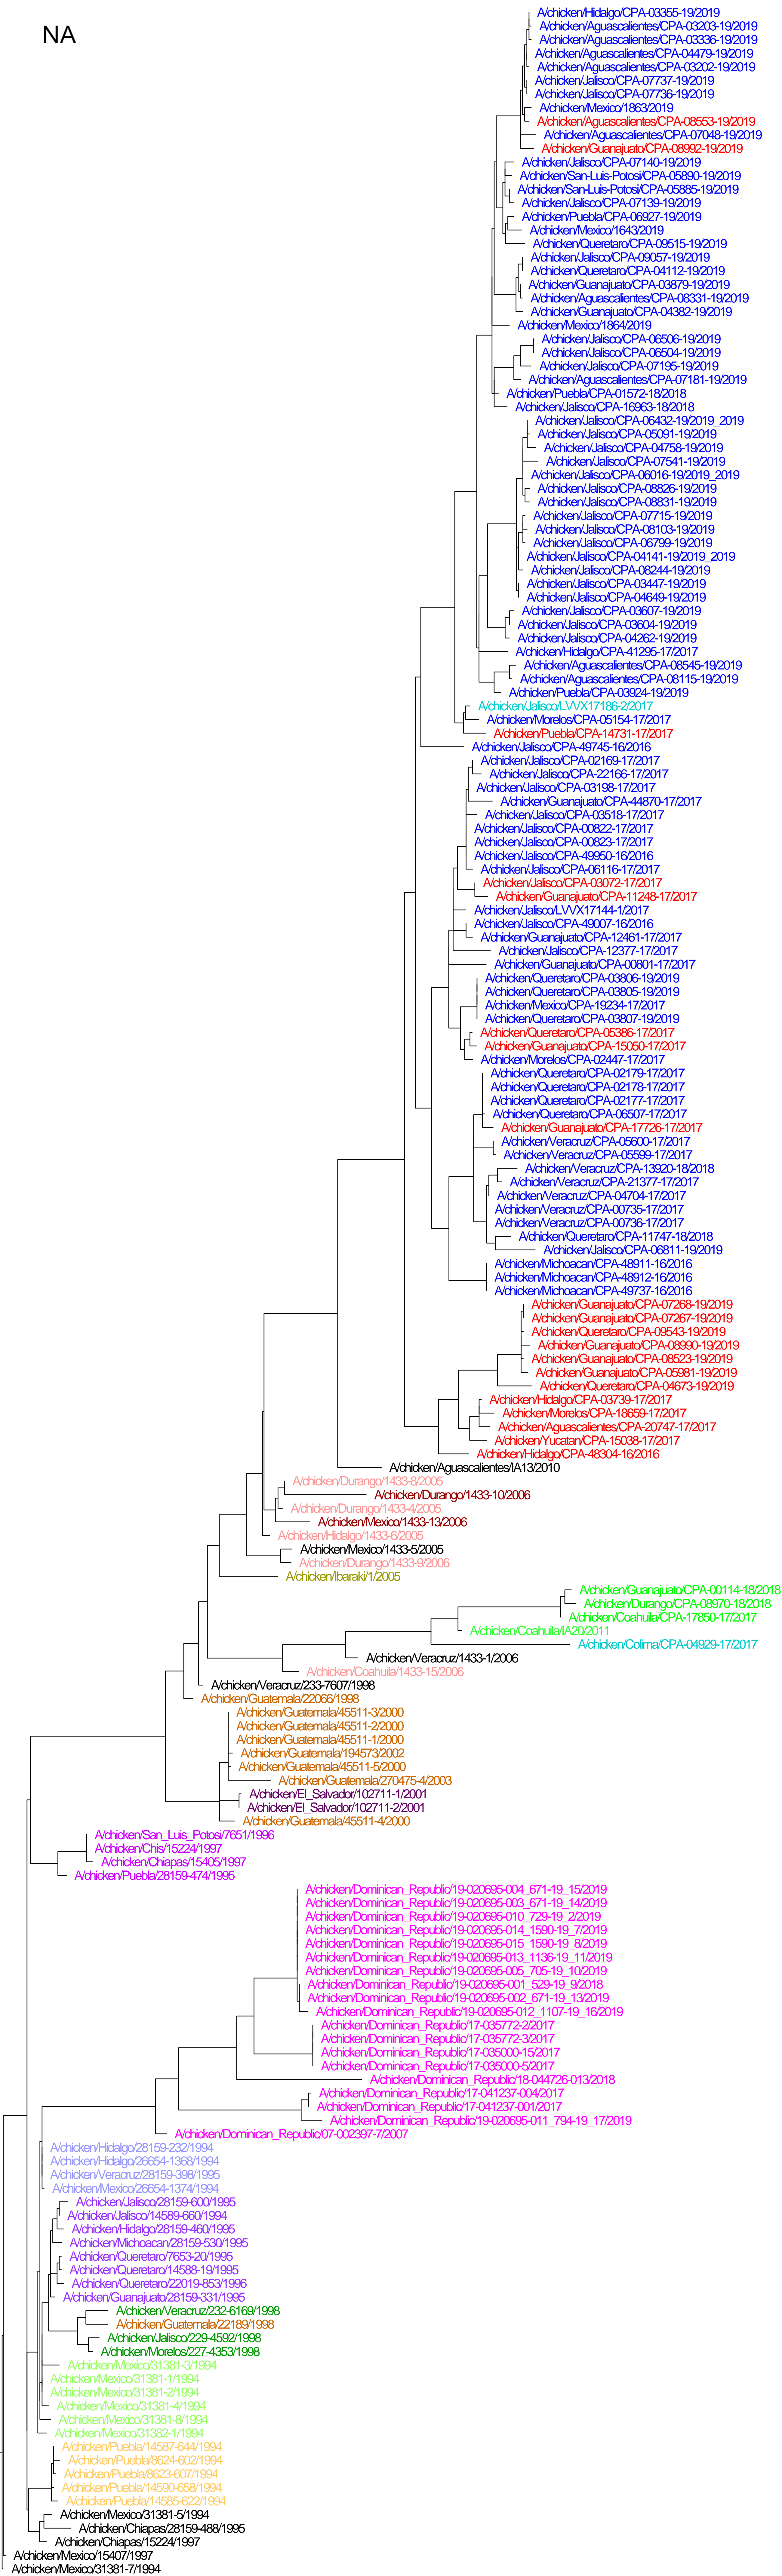

0.004



—  
0.004



NS

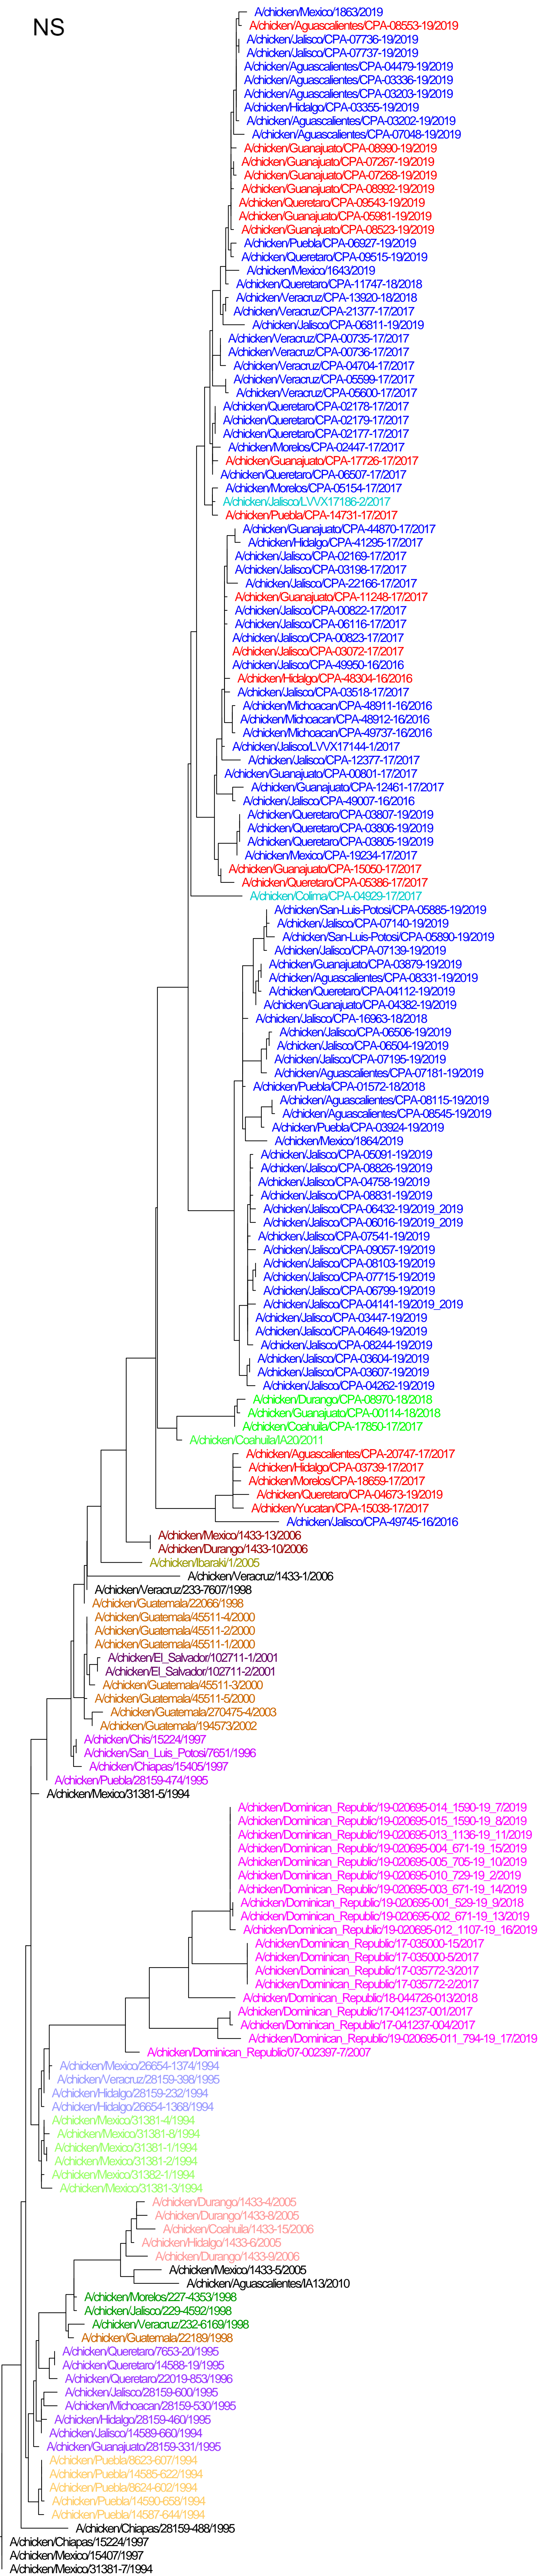

Supplement: s1 [file s1]
