# Supplementary material for: Evolutionary Dynamics of Mexican Lineage H5N2 Avian Influenza Viruses
Source: MDPI journal article supplement (doi:10.3390/v14050958), 2022-05-03
Supplement: s1 [file s1]

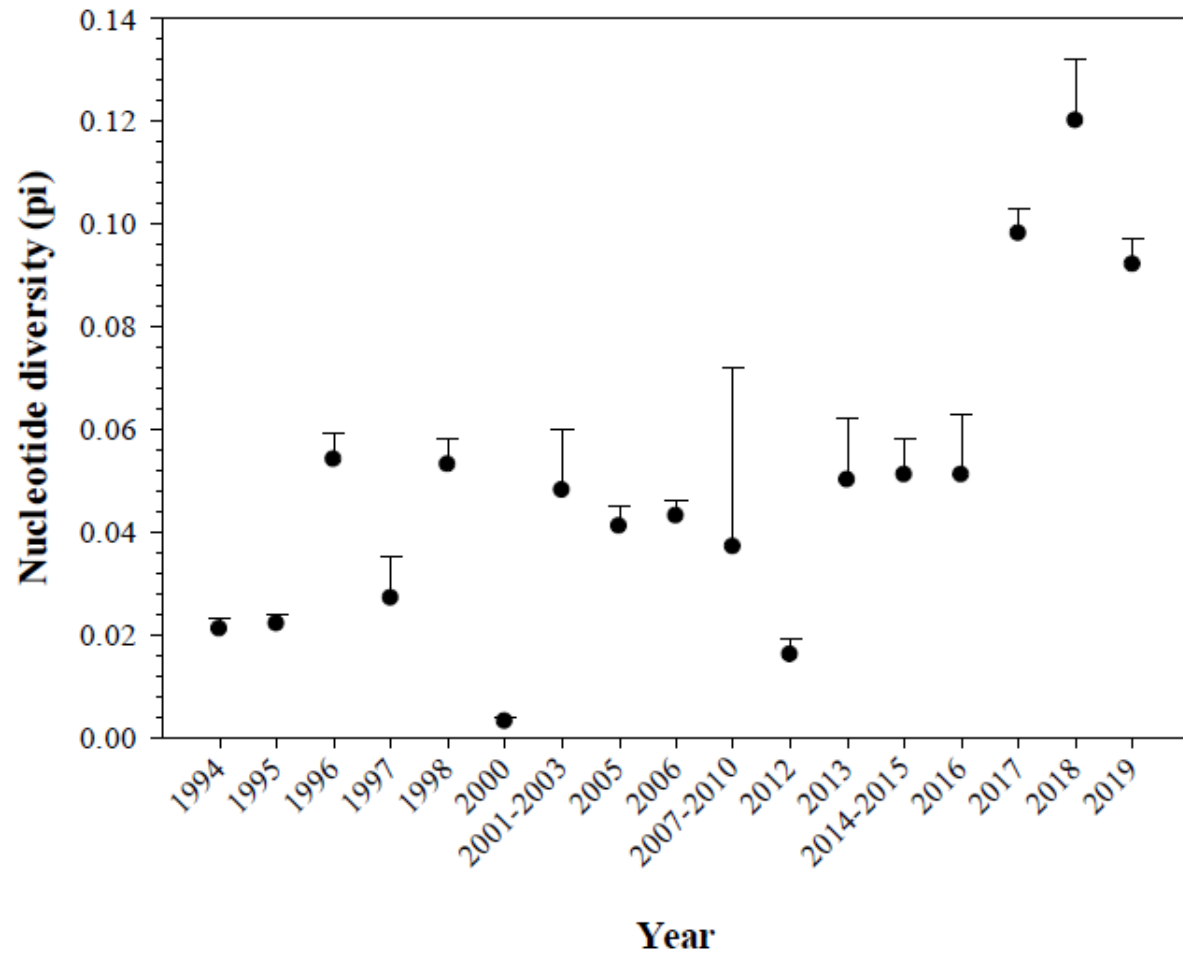

**Figure S5.** Temporal changes in genetic diversities of Mexican lineage H5N2 AIVs. The HA genes from 284 H5N2 viruses were used to calculate the genetic diversity ( $\pi$ ) detected in each year.
