# Supplementary material for: Evolutionary Dynamics of Mexican Lineage H5N2 Avian Influenza Viruses
Source: MDPI journal article supplement (doi:10.3390/v14050958), 2022-05-03
Supplement: s1 [file s1]

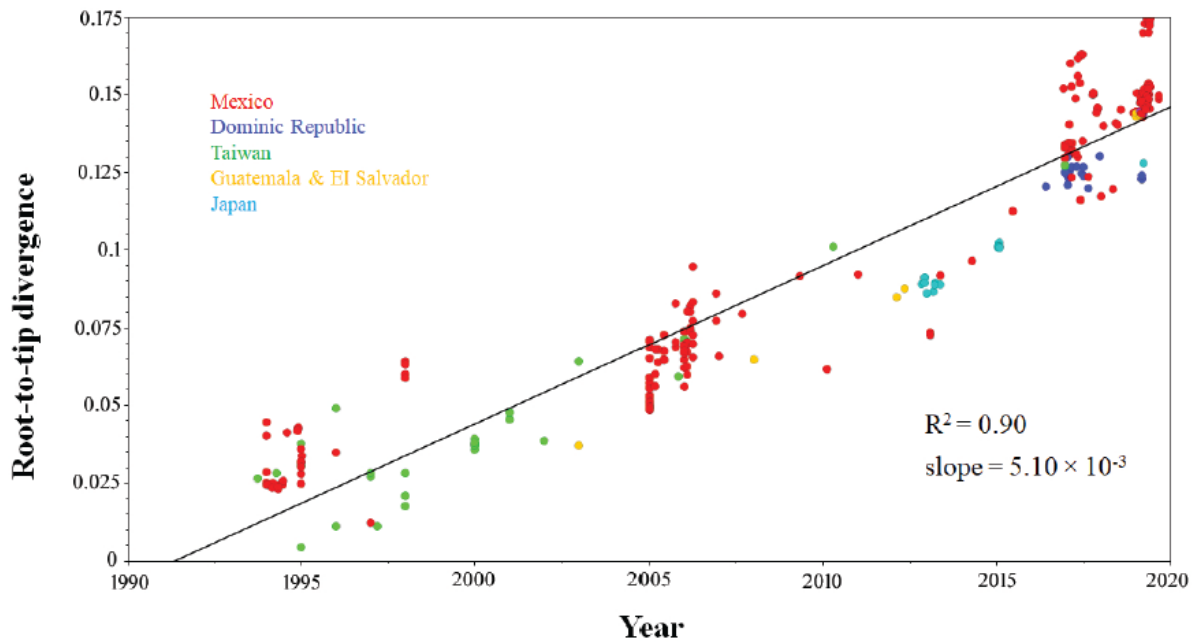

**Figure S3.** Clock-like nature of Mexican lineage H5N2 AIV evolution. Regression of root-to-tip genetic divergence against sampling date was performed based on a phylogeny of 284 complete HA sequences. Sequences are colored according to their geographic locations. Red, Mexico; blue, Dominican Republic; green, Taiwan; yellow, Guatemala and El Salvador; cyan, Japan.
